# Supplementary material for: Nanoscale electrochemical charge transfer kinetics investigated by electrochemical scanning microwave microscopy
Source: Royal Society of Chemistry journal article supplement (doi:10.1039/d2na00671e), 2022-11-17
Supplement: d2na00671e1.pdf [file d2na00671e1.pdf]

**Nanoscale Electrochemical charge transfer kinetics investigated by  
Electrochemical Scanning Microwave Microscopy.**

*Mohamed Awadein, Maxwell Sparey, Simon Grall, Ferry Kienberger, Nicolas Clement, and  
Georg Gramse\**

Mohamed Awadein, Maxwell Sparey, Ferry Kienberger, Georg Gramse

Keysight Labs Austria, Keysight Technologies, Linz 4020, Austria

E-mail: [georg.gramse@jku.at](mailto:georg.gramse@jku.at)

Simon Grall, Nicolas Clement

LIMMS/CNRS Institute of Industrial Science, University of Tokyo, Tokyo 153-8505, Japan.

Georg Gramse

Institute of Biophysics, Johannes Kepler University, Linz 4020, Austria.

Keywords: nano-electrochemistry, attoampere, radiofrequency, STM

## Contents

|                                                                                      |   |
|--------------------------------------------------------------------------------------|---|
| Figure S1                                                                            | 3 |
| Figure S2                                                                            | 4 |
| Figure S3                                                                            | 4 |
| Supplementary Note 1. Tip capacitance and radius                                     | 5 |
| Supplementary Note 2. Conductance change due to the increase of charge concentration | 6 |

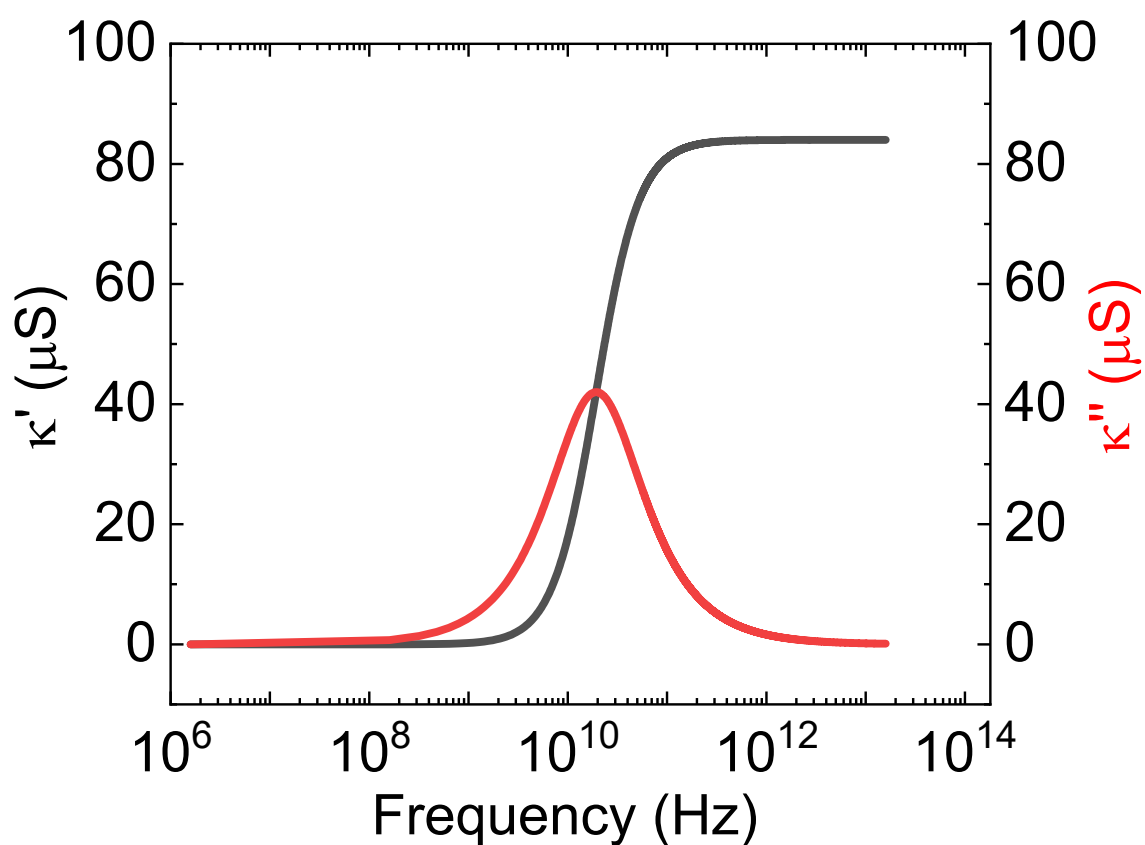

Figure S1 The complex conductance against high frequency. The black line is the real part of conductance  $\kappa'$ , the value of  $\kappa'$  increases at  $1/\tau \ll \omega$ . The red line is the imaginary part of the complex conductance  $\kappa''$ , the value  $\kappa''$  is  $\approx 0$  at  $1/\tau \ll \omega$

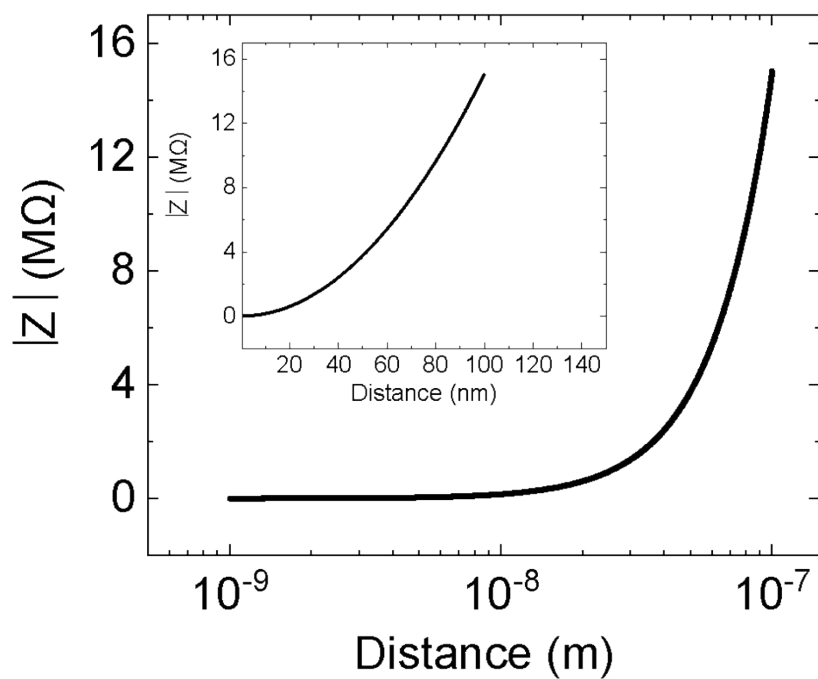

Figure S2 solution impedance at different tip-sample distances. The impedance rapidly increases at D at  $<100$ nm using equation 1.

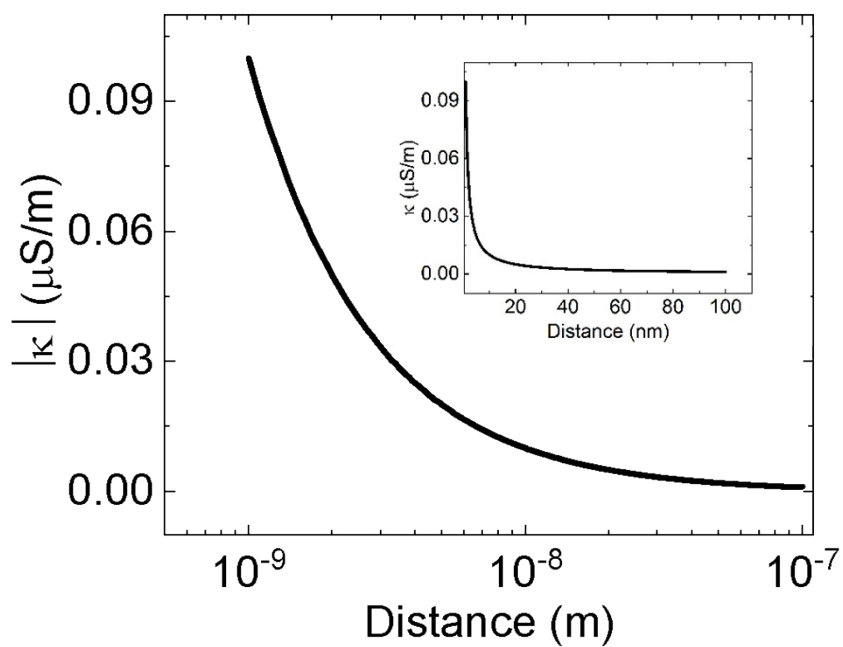

Figure S3 shows how the conductance decays as the distance increases; the conductance rapidly decreases at D at  $<100$ nm using equation 9

## Supplementary Note 1. tip capacitance and radius

The measured current is proportional with area therefore:

$$\frac{I_G}{A_G} = \frac{I_L}{A_L}$$

Where  $I_G$  and  $A_G$  are the current of global CV and the whole area of the sample,  $I_L$  and  $A_L$  are the current of local CV and the area of the tip.

$$\frac{0.6 \times 10^{-6} A}{0.25 cm^2} = \frac{16 \times 10^{-18} A}{A_L}$$

$$A_L = \frac{16 \times 10^{-18} A \times 0.25 cm^2}{0.6 \times 10^{-6} A} = 6.66 \times 10^{-12} cm^2 = 666 \pm 110 nm^2$$

$$A = \pi r^2 = 666 \pm 110 nm^2$$

$$r = 14 \pm 2 nm$$

$$C_p = \frac{3 (aA)}{666 (nm^2) \times 0.01 \left(\frac{V}{s}\right)} = 45 \mu F / cm^2$$

$$C = \frac{\epsilon A}{d}$$

Where is  $d=0.1 nm$ ,  $A=666 nm^2$

$$\epsilon = \frac{0.1 \times 10^{-9} m \times 45 \times 10^{-10} F}{666 \times 10^{-9} m^2} = 0.675 pF/m$$

Supplementary Note 2. Conductance change due to the increase of charge concentration

$$Z_{tot} = Z_{sol} + Z_{SAM} = L/(\kappa' + i\kappa'')A$$

$$Re(z) = d/(\kappa' + i\kappa'')A$$

$$Q_{ions} = Q_f(1 - \frac{Z_{SAM}}{Z_{tot}})$$

Where  $Z_{SAM}$  can be approximated to a parallel plate capacitor  $C_{SAM} = \frac{\epsilon_o \epsilon_r A}{d}$

$$\kappa_{\infty} = \frac{c_{ions}}{c_{water}} \kappa_{\infty, water} = \frac{Q_{ions}}{F A L c_w} \kappa_{\infty, w} = \frac{\kappa_{\infty, w}}{F A L c_w} Q_{ions} = \frac{\kappa_{\infty, w}}{F A L c_w} Q_f(1 - \frac{Z_{SAM}}{Z_{tot}})$$

$$\kappa_{\infty} = \frac{Q_f \times \kappa_{\infty, w}}{F A L c_w} \left( \frac{Z_{tot} - Z_{SAM}}{Z_{tot}} \right) = \frac{Q_f \times \kappa_{\infty, w}}{F A L c_w} \left( \frac{Z_{sol}}{Z_{tot}} \right) = \frac{Q_f \times \kappa'_{\infty, w}}{F A L c_w} \left( \frac{Z_{sol}}{Z_{sol} + Z_{SAM}} \right)$$

$$Z = \frac{1}{j\omega C} = \frac{1}{\frac{j\omega \epsilon A}{d}} = \frac{d}{j\omega \epsilon A}$$

$$\kappa_{\infty} = \frac{Q_f \times \kappa'_{\infty, w}}{F L A c_w} \left( \frac{\left( \frac{L}{j\omega A \epsilon_w} \right)}{\left( \frac{d}{j\omega A \epsilon_w} \right) + \left( \frac{h}{j\omega A \epsilon_{SAM}} \right)} \right) = \frac{Q_f \times \kappa'_{\infty, w}}{F L A c_w} \left( \frac{\left( \frac{L}{\epsilon_w} \right)}{\left( \frac{d}{\epsilon_w} \right) + \left( \frac{h}{\epsilon_{SAM}} \right)} \right)$$

$$\kappa_{\infty} = \frac{Q_f \times \kappa'_{\infty, w}}{F L A c_w} \left( \frac{\left( \frac{L}{\epsilon_w^*} \right)}{\left( \frac{\epsilon_{SAM}^* d}{\epsilon_{SAM}^* \epsilon_w^*} \right) + \left( \frac{\epsilon_w^* h}{\epsilon_w^* \epsilon_{SAM}^*} \right)} \right) = \frac{Q_f \times \kappa'_{\infty, w}}{F L A c_w} \left( \frac{\left( \frac{L}{\epsilon_w} \right)}{\left( \frac{\epsilon_{SAM} d + \epsilon_w h}{\epsilon_{SAM} \epsilon_w} \right)} \right)$$

$$\kappa_{\infty} = \frac{Q_f \times \kappa_{\infty, w}}{F A c_w} \left( \frac{\epsilon_{SAM}}{\epsilon_{SAM} L + \epsilon_w h} \right)$$
